# Supplementary material
Source: PubMed Central journal article supplement (PMC4048097)
Supplement: tjp0592-2389-SD3.pdf [file tjp0592-2389-SD3.pdf]

**Supplementary Table S3**

A tabulation of cell types and their role within pFTUs, together with a corresponding set of contiguous sFTUs, for 12 mammalian organ systems.

| Organ                                                                       | Secondary FTU                      | Primary FTU                                                                                                                  |                                                                                                                                                                                                                                                                                                                                  |
|-----------------------------------------------------------------------------|------------------------------------|------------------------------------------------------------------------------------------------------------------------------|----------------------------------------------------------------------------------------------------------------------------------------------------------------------------------------------------------------------------------------------------------------------------------------------------------------------------------|
|                                                                             |                                    | Cell types                                                                                                                   | Cell functions                                                                                                                                                                                                                                                                                                                   |
| <b>CARDIOVASCULAR SYSTEM</b>                                                |                                    |                                                                                                                              |                                                                                                                                                                                                                                                                                                                                  |
| Vascular system                                                             | Blood(B)<br>(1 mL volume)          | erythrocyte<br>reticulocyte<br>monocyte<br>lymphocyte<br>basophil<br>eosinophil<br>neutrophil<br>platelet<br>macrophage (MP) | bind O <sub>2</sub><br>immature RBC<br>innate response to pathogens, inflammatory response<br>T cell, B cell, NK cell (see immune cells)<br>s. heparine & histamine, <0.3% WBCs<br>combat multicellular parasites, 1-6% of WBCs<br>phagocyte, 40-75% of WBCs<br>thrombus formation, s. growth factors<br>engulf foreign material |
|                                                                             | Capillaries                        | endothelial cell (EC)<br>pericyte (PC)<br>B                                                                                  | transport, barrier<br>contractile cells that wrap around capillary & venule ECs                                                                                                                                                                                                                                                  |
|                                                                             | Arteries                           | smooth muscle cell (SMC)<br>fibroblast (FB)<br>B, EC                                                                         | contraction<br>s. collagen                                                                                                                                                                                                                                                                                                       |
|                                                                             | Veins                              | B, EC, SMC, FB, PC                                                                                                           |                                                                                                                                                                                                                                                                                                                                  |
| Heart<br>(Left ventricle<br>Right ventricle<br>Left atrium<br>Right atrium) | Muscle bundle                      | cardiomyocyte                                                                                                                | contraction, action potential<br>action potential                                                                                                                                                                                                                                                                                |
|                                                                             | Bundle of His<br>Purkinje network  | Purkinje cell                                                                                                                |                                                                                                                                                                                                                                                                                                                                  |
|                                                                             | Mitral valve<br>Aortic valve       | SMC                                                                                                                          |                                                                                                                                                                                                                                                                                                                                  |
|                                                                             | Muscle bundle                      | cardiomyocyte                                                                                                                |                                                                                                                                                                                                                                                                                                                                  |
|                                                                             | Purkinje network                   | Purkinje cell                                                                                                                |                                                                                                                                                                                                                                                                                                                                  |
|                                                                             | Tricuspid valve<br>Pulmonary valve | SMC                                                                                                                          |                                                                                                                                                                                                                                                                                                                                  |
|                                                                             | Muscle bundle                      | cardiomyocyte                                                                                                                |                                                                                                                                                                                                                                                                                                                                  |
|                                                                             | Muscle bundle<br>Sino-atrial node  | SAN cell<br>B, EC, SMC, FB, PC                                                                                               | action potential                                                                                                                                                                                                                                                                                                                 |
| Muscle bundle<br>Atrio-ventricular node                                     | AVN cell<br>B, EC, SMC, FB, PC     | action potential                                                                                                             |                                                                                                                                                                                                                                                                                                                                  |
| <b>RESPIRATORY SYSTEM (all pFTUs include B, EC, SMC, FB, PC, MP)</b>        |                                    |                                                                                                                              |                                                                                                                                                                                                                                                                                                                                  |
| Nasal cavities                                                              | Olfactory epithelium               | olfactory receptor neuron<br>sustentacular cell<br>basal cell                                                                | express olfactory (GPCR) receptors<br>provides structural support, glia-like, s. mucous<br>source of new receptor cells                                                                                                                                                                                                          |
| Pharynx                                                                     | Epithelial conduit                 | epithelia cell                                                                                                               | barrier                                                                                                                                                                                                                                                                                                                          |

|                                                                           |                                            |                                                                                                                                                                       |                                                                                                                                                   |
|---------------------------------------------------------------------------|--------------------------------------------|-----------------------------------------------------------------------------------------------------------------------------------------------------------------------|---------------------------------------------------------------------------------------------------------------------------------------------------|
| Larynx                                                                    | Epithelial conduit                         | epithelia cell<br>small granule cell                                                                                                                                  | barrier                                                                                                                                           |
| Lung<br>(Trachea & bronchi<br>Bronchioles & acinii)                       | Bronchi<br>(non-respiratory airways)       | epithelia cell<br>goblet cell<br>basal cell                                                                                                                           | Barrier<br>s. mucin                                                                                                                               |
|                                                                           | Alveolus<br>(respiratory airways)          | type 1 alveolar cell<br>type 2 alveolar cell<br>Clara cell                                                                                                            | 50nm barrier permeable to O <sub>2</sub> /CO <sub>2</sub> exchange. 97% surface.<br>s. surfactant<br>s. glycosaminoglycans                        |
| <b>MUSCULO-SKELETAL SYSTEM</b> (all pFTUs include B, EC, SMC, FB, PC, MP) |                                            |                                                                                                                                                                       |                                                                                                                                                   |
| Compact bone<br>Cancellous bone<br>Membranous bone                        | Osteon                                     | osteoblast<br>osteocyte<br>osteoclast                                                                                                                                 | orchestrate mineralisation of bone, s. dense, crosslinked collagen<br>osteoblast embedded within the bone matrix, s. sclerostin<br>dissolves bone |
| Muscle<br>(Fast fibres<br>Slow fibres)                                    | Motor unit                                 | muscle fibre<br>satellite cell                                                                                                                                        | contract<br>quiescent mononucleated myogenic cells                                                                                                |
|                                                                           | Motor end plate                            | neuron<br>muscle fibre                                                                                                                                                | activation of muscle fibre<br>contraction                                                                                                         |
|                                                                           | Muscle spindle                             | type Ia sensory fiber<br>type II sensory fiber<br>alpha motor neuron<br>gamma motor neuron<br>beta motor neuron<br>intrafusal muscle fibre<br>extrafusal muscle fiber |                                                                                                                                                   |
|                                                                           | Golgi tendon organ                         | Neuron                                                                                                                                                                |                                                                                                                                                   |
| Tendon                                                                    | Fascicle                                   | tenocyte<br>perifibrotenocyte                                                                                                                                         | elongated fibroblast (needs tension to maintain cell type)                                                                                        |
| Ligament                                                                  | White ligament<br>Yellow ligament<br>Bursa | fibrocyte                                                                                                                                                             | inactive mesenchymal cell                                                                                                                         |
| Articular Cartilage                                                       | Chondron                                   | chondroblast<br>chondrocyte<br>chondroclast                                                                                                                           | forms chondrocytes (originates in MSC)<br>s. cartilage matrix & is embedded in it<br>removes chondroblasts                                        |
|                                                                           | Synovial fluid                             | factors that maintain cartilage                                                                                                                                       |                                                                                                                                                   |
| <b>DIGESTIVE SYSTEM</b> (all pFTUs include B, EC, SMC, FB, PC, MP)        |                                            |                                                                                                                                                                       |                                                                                                                                                   |
| Mouth<br>Oral cavity                                                      | Taste bud                                  | taste receptor cell<br>support cell<br>basal cell                                                                                                                     | receptors for salty, sour, bitter, sweet & umami<br>glia-like, s. mucous<br>source of new receptor cells                                          |

|                                                   |                                                         |                                                                                                                                                                      |                                                                                                                                                                                                                                                                                                 |
|---------------------------------------------------|---------------------------------------------------------|----------------------------------------------------------------------------------------------------------------------------------------------------------------------|-------------------------------------------------------------------------------------------------------------------------------------------------------------------------------------------------------------------------------------------------------------------------------------------------|
| Salivary glands                                   | Parotid gland                                           | mucous cell<br>serous cell<br>intercalated duct cell<br>striated duct cell                                                                                           | s. mucous<br><br>s. $\alpha$ -amylase (carbohydrate digestion)                                                                                                                                                                                                                                  |
|                                                   | Submandibular gland                                     | mucous cell<br>serous cell                                                                                                                                           | produce 60-67% of the total volume of saliva                                                                                                                                                                                                                                                    |
|                                                   | Sublingual gland                                        | mucous cell<br>serous cell                                                                                                                                           | major salivary glands in the mouth                                                                                                                                                                                                                                                              |
| Tongue                                            | Glands                                                  |                                                                                                                                                                      | s. lipase (fat digestion)                                                                                                                                                                                                                                                                       |
| Tooth                                             |                                                         | ameloblast<br>odontoblast                                                                                                                                            | s. tooth enamel<br>s. dentin                                                                                                                                                                                                                                                                    |
| Nose                                              |                                                         |                                                                                                                                                                      |                                                                                                                                                                                                                                                                                                 |
| Oesophagus                                        | Epithelial conduit                                      | epithelial cell                                                                                                                                                      | peristaltic wave                                                                                                                                                                                                                                                                                |
| Stomach                                           | Antrum                                                  | G cells                                                                                                                                                              | s. gastrin                                                                                                                                                                                                                                                                                      |
|                                                   | Gastric gland                                           | surface mucous cell<br>mucous neck cell<br>parietal cell<br>principal (chief) cell                                                                                   | s. HCL, intrinsic factor<br>s. pepsinogens                                                                                                                                                                                                                                                      |
| Small intestine<br>(Duodenum<br>Jejunum<br>Ilium) | Gastric gland<br>Crypt of Lieberkuhn<br>Brunner's gland | surface mucous cells<br>mucous neck cells<br>parietal cells<br>enteroendocrine D cell<br>enteroendocrine ECL cell<br>principal (chief) cell<br>enterochromaffin cell | s. $\text{HCO}_3^-$ , mucus<br>s. mucus<br>s. HCL, intrinsic factor<br>s. somatostatin<br>s. histamine, gastrin, secretin, CCK<br>s. pepsinogens<br>s. 5-HT                                                                                                                                     |
|                                                   | Villus                                                  | Goblet cell<br>epithelial cell                                                                                                                                       | s. mucus                                                                                                                                                                                                                                                                                        |
| Large intestine                                   | Crypt                                                   | Paneth cell                                                                                                                                                          | immunological function                                                                                                                                                                                                                                                                          |
|                                                   | Villus                                                  | Goblet cell<br>enteroendocrine cell                                                                                                                                  | s. mucus<br>s. hormones                                                                                                                                                                                                                                                                         |
| Colon<br>(Secum, Anus)                            | Crypt                                                   | epithelial cell<br>endocrine cell                                                                                                                                    | s. peptide YY                                                                                                                                                                                                                                                                                   |
| Liver                                             | Liver lobule                                            | hepatocyte<br><br>Kupffer cell<br>stellate cell<br>B, EC, FB                                                                                                         | detoxification, modification, and excretion of exogenous and endogenous substances<br>s. cholesterol, bile salts and phospholipids<br>carbohydrate metabolism, protein synthesis & storage<br>specialised macrophages in space of Disse<br>precursor hepatocyte or FB? Role in immune reaction. |
| Gall bladder                                      |                                                         | epithelial cell                                                                                                                                                      |                                                                                                                                                                                                                                                                                                 |
| Exocrine pancreas                                 | Intra- & inter-lobular ducts                            | epithelial cell<br>centroacinar cell<br>pancreatic acinar cell                                                                                                       | s. $\text{HCO}_3^-$ , protease precursors, lipase,<br>s. $\alpha$ -amylase, collagenase, elastase, ribonuclease<br>s. $\alpha$ -amylase, collagenase, elastase, ribonuclease                                                                                                                    |

| <b>URINARY SYSTEM</b> (all pFTUs include B, EC, SMC, FB, PC, MP)   |                                                                                                                     |                                                                                                                                        |                                                                                                                                                                                                                                                                                                                                                                                                         |
|--------------------------------------------------------------------|---------------------------------------------------------------------------------------------------------------------|----------------------------------------------------------------------------------------------------------------------------------------|---------------------------------------------------------------------------------------------------------------------------------------------------------------------------------------------------------------------------------------------------------------------------------------------------------------------------------------------------------------------------------------------------------|
| Kidney                                                             | Nephron<br>(Bowman's capsule<br>Glomerulus<br>Proximal tubule<br>Loop of Henle<br>Distal tubule<br>Collecting duct) | mesangial cell<br>podocyte                                                                                                             | specialized SMC<br>wrap around capillaries of glomerulus                                                                                                                                                                                                                                                                                                                                                |
|                                                                    |                                                                                                                     | juxtaglomerular cell<br>proximal tubule cell<br>thin segment epithelial cell<br>principal cell of collecting duct<br>intercalated cell | s. renin (specialised SMC)<br>Na <sup>+</sup> & H <sub>2</sub> O uptake; H <sup>+</sup> / HCO <sub>3</sub> <sup>-</sup> exchange; s. organic acids<br>descending limb of Henle highly permeable to H <sub>2</sub> O<br>ascending limb of Henle impermeable to H <sub>2</sub> O<br>control Na <sup>+</sup> & H <sub>2</sub> O uptake in response to aldosterone and vasopressin<br>acid-base homeostasis |
| Urinary bladder                                                    | Epithelial conduit                                                                                                  | epithelial cell                                                                                                                        | barrier                                                                                                                                                                                                                                                                                                                                                                                                 |
| Ureter                                                             | Epithelial conduit                                                                                                  | epithelial cell                                                                                                                        | barrier                                                                                                                                                                                                                                                                                                                                                                                                 |
| Urethra                                                            | Epithelial conduit                                                                                                  | epithelial cell                                                                                                                        | barrier                                                                                                                                                                                                                                                                                                                                                                                                 |
| <b>ENDOCRINE SYSTEM</b> (all pFTUs include B, EC, SMC, FB, PC, MP) |                                                                                                                     |                                                                                                                                        |                                                                                                                                                                                                                                                                                                                                                                                                         |
| Pituitary gland                                                    | Adeno-hypophysis                                                                                                    | somatotrope (GH cell)<br>lactotrope (PRL cell)<br>corticotrope (ACTH cell)<br>gonadotrope (FSH & LH cells)<br>thyrotrope (TSH cell)    | s. growth hormone (GH)<br>s. prolactin (PRL) (s. milk production, gonadal function)<br>s. ACTH (s. cortisol secretion from adrenal cortex)<br>s. FSH & LH (control gonadal function)<br>s. TSH (s. release of thyroxine from thyroid gland)                                                                                                                                                             |
|                                                                    | Neuro-hypophysis                                                                                                    |                                                                                                                                        |                                                                                                                                                                                                                                                                                                                                                                                                         |
| Thyroid gland                                                      | Thyroid gland                                                                                                       | follicular epithelial cell<br>parafollicular cell                                                                                      | s. thyroid hormones (thyroxine & triiodothyronine)<br>s. calcitonin                                                                                                                                                                                                                                                                                                                                     |
| Parathyroid glands                                                 | Parathyroid gland                                                                                                   | principal cell<br>oxyphil cell                                                                                                         | s. parathyroid hormone<br>s. parathyroid hormone-related protein (PTHrP) & calcitriol                                                                                                                                                                                                                                                                                                                   |
| Adrenal gland                                                      | Adrenal medulla                                                                                                     | chromaffin cell                                                                                                                        | s. catecholamines (neuroendocrine cells)                                                                                                                                                                                                                                                                                                                                                                |
|                                                                    | Adrenal cortex                                                                                                      | adrenocortical cells                                                                                                                   | s. aldosterone and cortisol                                                                                                                                                                                                                                                                                                                                                                             |
| Endocrine pancreas                                                 | Islet of Langerhan                                                                                                  | α cell<br>β cell<br>δ cell                                                                                                             | s. glucagon<br>s. insulin<br>s. somatostatin                                                                                                                                                                                                                                                                                                                                                            |
| Pineal gland                                                       | Pineal gland                                                                                                        | pinealocyte                                                                                                                            | s. melatonin                                                                                                                                                                                                                                                                                                                                                                                            |
| <b>IMMUNE SYSTEM</b> (all pFTUs include B, EC, SMC, FB, PC, MP)    |                                                                                                                     |                                                                                                                                        |                                                                                                                                                                                                                                                                                                                                                                                                         |
| Bone marrow                                                        |                                                                                                                     | haemopoietic cell<br>mesenchymal cell<br>osteoprogenitor cell                                                                          | pluripotent cell that generates blood cells<br>multipotent stromal cell (SMC) → osteoblast, chondrocyte, adipocyte<br>mesenchymal cell that differentiates into an osteoblast                                                                                                                                                                                                                           |
| Spleen                                                             | Red pulp<br>White pulp                                                                                              |                                                                                                                                        |                                                                                                                                                                                                                                                                                                                                                                                                         |
| Thymus                                                             | Thymus                                                                                                              | thymocyte<br>Hassal's corpuscle epi. cell                                                                                              | generate T cells<br>s. cytokine TSLP                                                                                                                                                                                                                                                                                                                                                                    |
| Lymph node                                                         | Lymph node                                                                                                          | B cell<br>helper-T cell<br>cytotoxic-T cell<br>NK cell                                                                                 | s. antibodies<br>CD4+ T cell, s. lymphokines to activate B cells & killer T cells<br>CD8+ T cell, active against virus infected & cancer cells<br>cytotoxic lymphocyte (innate immune system)                                                                                                                                                                                                           |
| <b>NERVOUS SYSTEM</b> (all pFTUs include B, EC, SMC, FB, PC, MP)   |                                                                                                                     |                                                                                                                                        |                                                                                                                                                                                                                                                                                                                                                                                                         |
| Forebrain  <br>elencephalon                                        | Cortical column                                                                                                     | neuron<br>astrocyte or glial cell                                                                                                      | conduct action potential<br>control environment around synapses                                                                                                                                                                                                                                                                                                                                         |

|                                                  |                                                                                                                                                                                             |                                                                                |                                                                                                                                            |
|--------------------------------------------------|---------------------------------------------------------------------------------------------------------------------------------------------------------------------------------------------|--------------------------------------------------------------------------------|--------------------------------------------------------------------------------------------------------------------------------------------|
| Cerebral cortex                                  |                                                                                                                                                                                             | microglia<br>oligodendrocyte                                                   | s. CSF; line the CSF-filled ventricles (type of glial cell)<br>macrophages of brain<br>insulate neurons (type of neuroglia)                |
| Ventricles                                       |                                                                                                                                                                                             | ependymal cell                                                                 |                                                                                                                                            |
| Limbic system                                    | Cingulate gyrus                                                                                                                                                                             |                                                                                |                                                                                                                                            |
|                                                  | Hippocampus                                                                                                                                                                                 |                                                                                |                                                                                                                                            |
|                                                  | Septum                                                                                                                                                                                      |                                                                                |                                                                                                                                            |
|                                                  | Amygdala                                                                                                                                                                                    |                                                                                |                                                                                                                                            |
| Basal ganglia                                    | Caudate nucleus                                                                                                                                                                             |                                                                                |                                                                                                                                            |
|                                                  | Putamen                                                                                                                                                                                     | cholinergic interneuron<br>GABA/parvalbumin interneuron<br>SOM/NOS interneuron | s. acetylcholine<br>s. GABA & parvalbumin<br>s. somatostatin (SOM) & nitric oxide synthase (NOS)                                           |
|                                                  | Globus pallidus                                                                                                                                                                             |                                                                                |                                                                                                                                            |
|                                                  | Subthalamic nucleus                                                                                                                                                                         |                                                                                |                                                                                                                                            |
| Forebrain<br>Diencephalon                        | <u>Subregions that modulate</u><br>Motor<br>Behaviour<br>Mood<br>Auditory<br>Limbic<br>...                                                                                                  |                                                                                |                                                                                                                                            |
| Thalamus                                         |                                                                                                                                                                                             |                                                                                |                                                                                                                                            |
| Hypothalamus                                     | Supraoptic nuclei                                                                                                                                                                           |                                                                                | s. vasopressin                                                                                                                             |
|                                                  | Paraventricular nuclei                                                                                                                                                                      |                                                                                | s. oxytocin                                                                                                                                |
| <u>Brain stem</u><br>Midbrain<br>(Mesencephalon) | Substantia nigra<br>Superior colliculus<br>Inferior colliculus                                                                                                                              |                                                                                |                                                                                                                                            |
|                                                  | Pons                                                                                                                                                                                        |                                                                                |                                                                                                                                            |
|                                                  | Inferior olive                                                                                                                                                                              |                                                                                |                                                                                                                                            |
|                                                  | Red nucleus                                                                                                                                                                                 |                                                                                |                                                                                                                                            |
| Hindbrain<br>(Rhombencephalon)                   | Medulla                                                                                                                                                                                     |                                                                                |                                                                                                                                            |
|                                                  | Cerebellum                                                                                                                                                                                  | basket cell<br>Golgi cell<br>granule cell<br>Purkinje cell                     | inhibitory GABA-ergic interneuron<br>inhibitory GABA-ergic interneuron (granule cell layer)<br>afferent neuron<br>GABA-ergic output neuron |
| Reticular formation                              | HR control<br>Respiratory control<br>...                                                                                                                                                    |                                                                                |                                                                                                                                            |
|                                                  | Olfactory (1)<br>Optic (2)<br>Eye muscles (3,4,6)<br>Sensory face (5)<br>Motor face (7)<br>Vestibular system (8)<br>Cochlea (8)<br>Gut autonomic (9,10)<br>Neck muscles (11)<br>Tongue (12) |                                                                                |                                                                                                                                            |
| Cranial nuclei                                   |                                                                                                                                                                                             |                                                                                |                                                                                                                                            |

|                                                                              |                                                                                                                                  |                                                                                                                                                                       |                                                                                                                                                                                                                                            |
|------------------------------------------------------------------------------|----------------------------------------------------------------------------------------------------------------------------------|-----------------------------------------------------------------------------------------------------------------------------------------------------------------------|--------------------------------------------------------------------------------------------------------------------------------------------------------------------------------------------------------------------------------------------|
| Spinal chord                                                                 | <i>Dorsal horn</i> (skin sensory)<br><i>Intermediate horn</i> (autonomic sensory & motor)<br><i>Ventral horn</i> (motor control) | Neuron<br>Interneuron<br>Oligodendritic cell<br>Microglia<br>Astrocyte<br>Schwann cell                                                                                |                                                                                                                                                                                                                                            |
| <b>INTEGUMENTARY SYSTEM</b> (all pFTUs include B, EC, SMC, FB, PC, MP)       |                                                                                                                                  |                                                                                                                                                                       |                                                                                                                                                                                                                                            |
| Skin                                                                         | Epidermis                                                                                                                        | keratinocyte<br>stratum germinativum cell<br>stratum spinosum cell<br>stratum granulosum cell<br>stratum corneum cell<br>melanocyte<br>Langerhans cell<br>Merkel cell | s. keratin, barrier<br>basal layer<br>s. keratin, desmosomal connections to adjacent cells<br>s. keratohyalin granules<br>outer layer, dead cells<br>s. melanin<br>dendritic APC of skin<br>synaptic contacts with somatosensory afferents |
|                                                                              | Eccrine sweat gland                                                                                                              | myoepithelial cell<br>apocrine sweat gland cell<br>sebaceous gland cell<br>mucous epithelial cell<br>mesothelial cell<br>synovial cell                                | contract to aid secretion                                                                                                                                                                                                                  |
|                                                                              | Apocrine sweat gland                                                                                                             | myoepithelial cell                                                                                                                                                    | contract to aid secretion                                                                                                                                                                                                                  |
| <b>FEMALE REPRODUCTIVE SYSTEM</b> (all pFTUs include B, EC, SMC, FB, PC, MP) |                                                                                                                                  |                                                                                                                                                                       |                                                                                                                                                                                                                                            |
| Ovaries                                                                      | Ovary                                                                                                                            | oocyte<br>theca interna cell<br>lutein cell                                                                                                                           | give rise to egg by meiosis<br>express receptors for luteinizing hormone (LH)<br>s. progesterone and estrogen                                                                                                                              |
| Fallopian tubes                                                              | Epithelial conduit                                                                                                               | secretory cell<br>ciliated cell                                                                                                                                       |                                                                                                                                                                                                                                            |
| Uterus                                                                       | Epithelial conduit                                                                                                               | endometrial epithelial cell<br>endometrial granulocyte<br>decidual cell                                                                                               |                                                                                                                                                                                                                                            |
| Placenta                                                                     |                                                                                                                                  | cytotrophoblast<br>Hofbauer cell<br>EC, SMC, FB, PC, MP                                                                                                               | cover the entire surface of the villous tree<br>macrophage; s. VEGF & other proangiogenic factors                                                                                                                                          |
| Vagina                                                                       | Epithelial conduit                                                                                                               | epithelia cell                                                                                                                                                        |                                                                                                                                                                                                                                            |
| External genitalia                                                           |                                                                                                                                  |                                                                                                                                                                       |                                                                                                                                                                                                                                            |
| Breasts                                                                      | Mammary gland                                                                                                                    | alveolar<br>myoepithelial cell<br>mammary gland cell                                                                                                                  | contract under the stimulation of oxytocin<br>s. milk                                                                                                                                                                                      |
| <b>MALE REPRODUCTIVE SYSTEM</b> (all pFTUs include B, EC, SMC, FB, PC, MP)   |                                                                                                                                  |                                                                                                                                                                       |                                                                                                                                                                                                                                            |
| Testis                                                                       |                                                                                                                                  | spermatocyte<br>spermatid<br>spermatozoon                                                                                                                             | diploid cell that undergoes meiosis to form four spermatids haploid male<br>germ cell that has completed meiosis<br>mature motile sperm cell                                                                                               |
| Ductuli efferentes                                                           |                                                                                                                                  |                                                                                                                                                                       |                                                                                                                                                                                                                                            |

|                                                                  |                              |                                                                                                                                                     |                                                                                                                                                                                                                                                                                                               |
|------------------------------------------------------------------|------------------------------|-----------------------------------------------------------------------------------------------------------------------------------------------------|---------------------------------------------------------------------------------------------------------------------------------------------------------------------------------------------------------------------------------------------------------------------------------------------------------------|
| Seminal vesicle                                                  | Epithelial conduit           |                                                                                                                                                     |                                                                                                                                                                                                                                                                                                               |
| Penis                                                            | Epithelial conduit           |                                                                                                                                                     |                                                                                                                                                                                                                                                                                                               |
| <b>SPECIAL SENSES (all pFTUs include B, EC, SMC, FB, PC, MP)</b> |                              |                                                                                                                                                     |                                                                                                                                                                                                                                                                                                               |
| Eye                                                              | Sclera                       | lacrimal gland cell                                                                                                                                 |                                                                                                                                                                                                                                                                                                               |
|                                                                  | Retina                       | rod cell<br>cone cell<br>Muller cell<br>amacrine cell<br>bipolar cell<br>retina ganglion cell<br>pigment epithelial cell<br>ciliary epithelial cell | photoreceptor used in peripheral field (low light vision)<br>photoreceptor used in fovea centralis (colour vision)<br>retinal glial cells<br>interneurons for photoreceptors to ganglion cells (70%)<br>interneurons for photoreceptors to ganglion cells (30%)<br>retinal neurons<br>precursor retinal cells |
|                                                                  | Lens                         | epithelial cell                                                                                                                                     |                                                                                                                                                                                                                                                                                                               |
|                                                                  | Cornea                       | epithelial cell                                                                                                                                     |                                                                                                                                                                                                                                                                                                               |
|                                                                  |                              |                                                                                                                                                     |                                                                                                                                                                                                                                                                                                               |
| Ear                                                              | Outer ear                    |                                                                                                                                                     |                                                                                                                                                                                                                                                                                                               |
|                                                                  | Middle ear Ceruminous glands |                                                                                                                                                     | s. wax                                                                                                                                                                                                                                                                                                        |
|                                                                  | Cochlea<br>Organ of corti    | inner hair cell<br>outer hair cell<br>supporting cell                                                                                               | mechano-sensory cell<br>contractile cell that changes stiffness of tectorial membrane to sharpen frequency discrimination<br>structural                                                                                                                                                                       |
| Vestibular function                                              | Vestibular labyrinth         | hair cell type I & II<br>supporting cell<br>dark cell of crista ampullaris                                                                          | mechano-sensory cell<br>structural<br>role in fluid transport                                                                                                                                                                                                                                                 |
